# Supplementary material
Source: PubMed Central journal article supplement (PMC5562523)
Supplement: NIHMS890485-supplement-1.pdf [file NIHMS890485-supplement-1.pdf]

## **Supplemental Figure and Tables**

**Supplemental Figure 1. Impact of AC2P36 on Mtb pH homeostasis, sensitivity to oxidative stress, related to Figures 1 and 3.** A) AC2P36 does not impact the cytoplasmic pH of Mtb at pH 5.7. DMSO and nigericin are added as negative and positive controls. Data are representative of two independent experiments. B) Mtb does not exhibit enhanced sensitivity AC2P36 treatment in combination with the superoxide generating compound menadione. C) A CDC1551(katG::Tn) mutant strain and the complemented strain exhibit similar sensitivity to AC2P36 as the WT Mtb.

**Supplemental Table 1.** AC2P36 spectrum of activity against Gram-positive and Gram-negative bacteria, related to Figure 1.

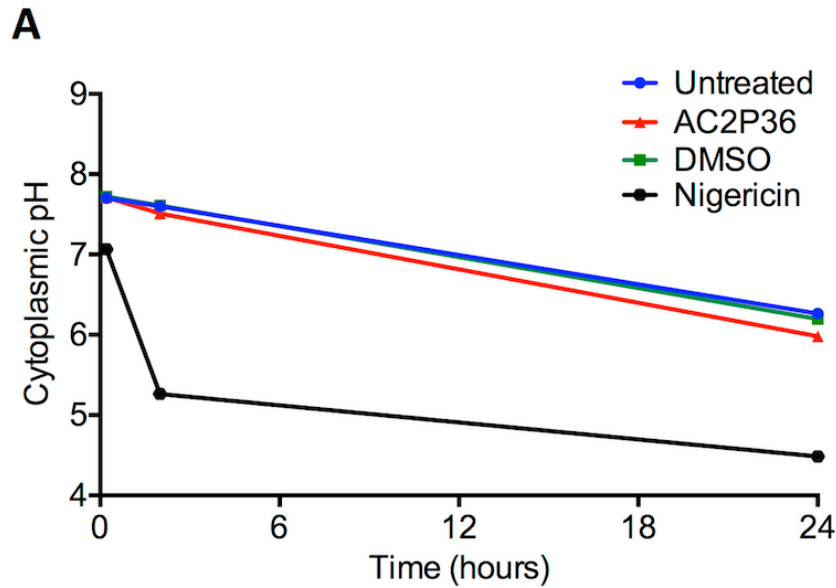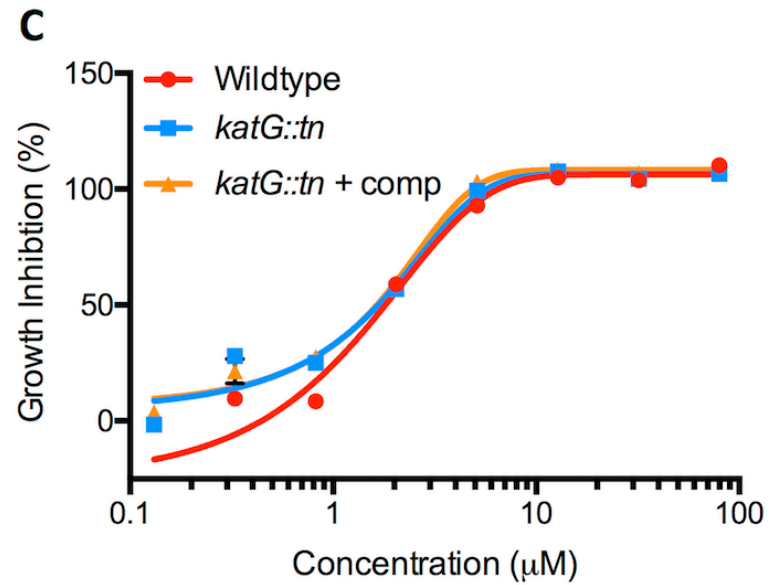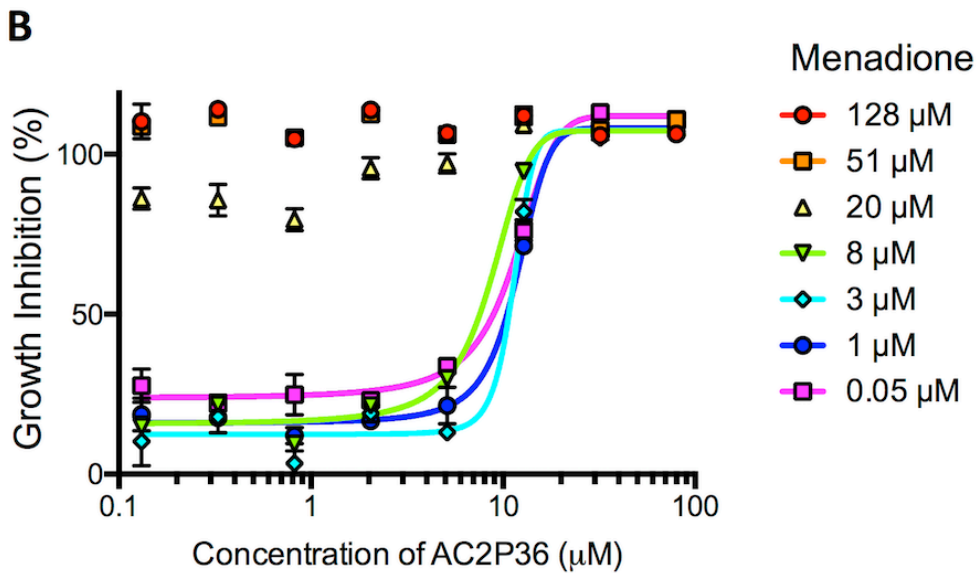

| Bacterial Strain       | EC <sub>50</sub> (μM) |        |
|------------------------|-----------------------|--------|
|                        | pH 7.0                | pH 5.7 |
| <i>E. coli</i>         | >100                  | >100   |
| <i>E. faecalis</i>     | 46                    | 65     |
| <i>M. tuberculosis</i> | ~40                   | 3.2    |
| <i>P. aeruginosa</i>   | >100                  | >100   |
| <i>P. vulgaris</i>     | >100                  | >100   |
| <i>S. aureus</i> 29213 | 13                    | 14     |
| <i>S. aureus</i> 25923 | 20                    | 18     |

Supplemental Table 1
